# Supplementary material for: First description of betalains biosynthesis in an aquatic organism: characterization of 4,5‐DOPA‐extradiol‐dioxygenase activity in the cyanobacteria Anabaena cylindrica
Source: PubMed Central journal article supplement — Microb Biotechnol. 2020 Aug 6;13(6):1948–59. doi: 10.1111/1751-7915.13641 (PMC7533325; doi:10.1111/1751-7915.13641), 2020-08-06
Supplement: MBT2-13-1948-s001.pdf [file MBT2-13-1948-s001.pdf]

Tree scale: 0.1

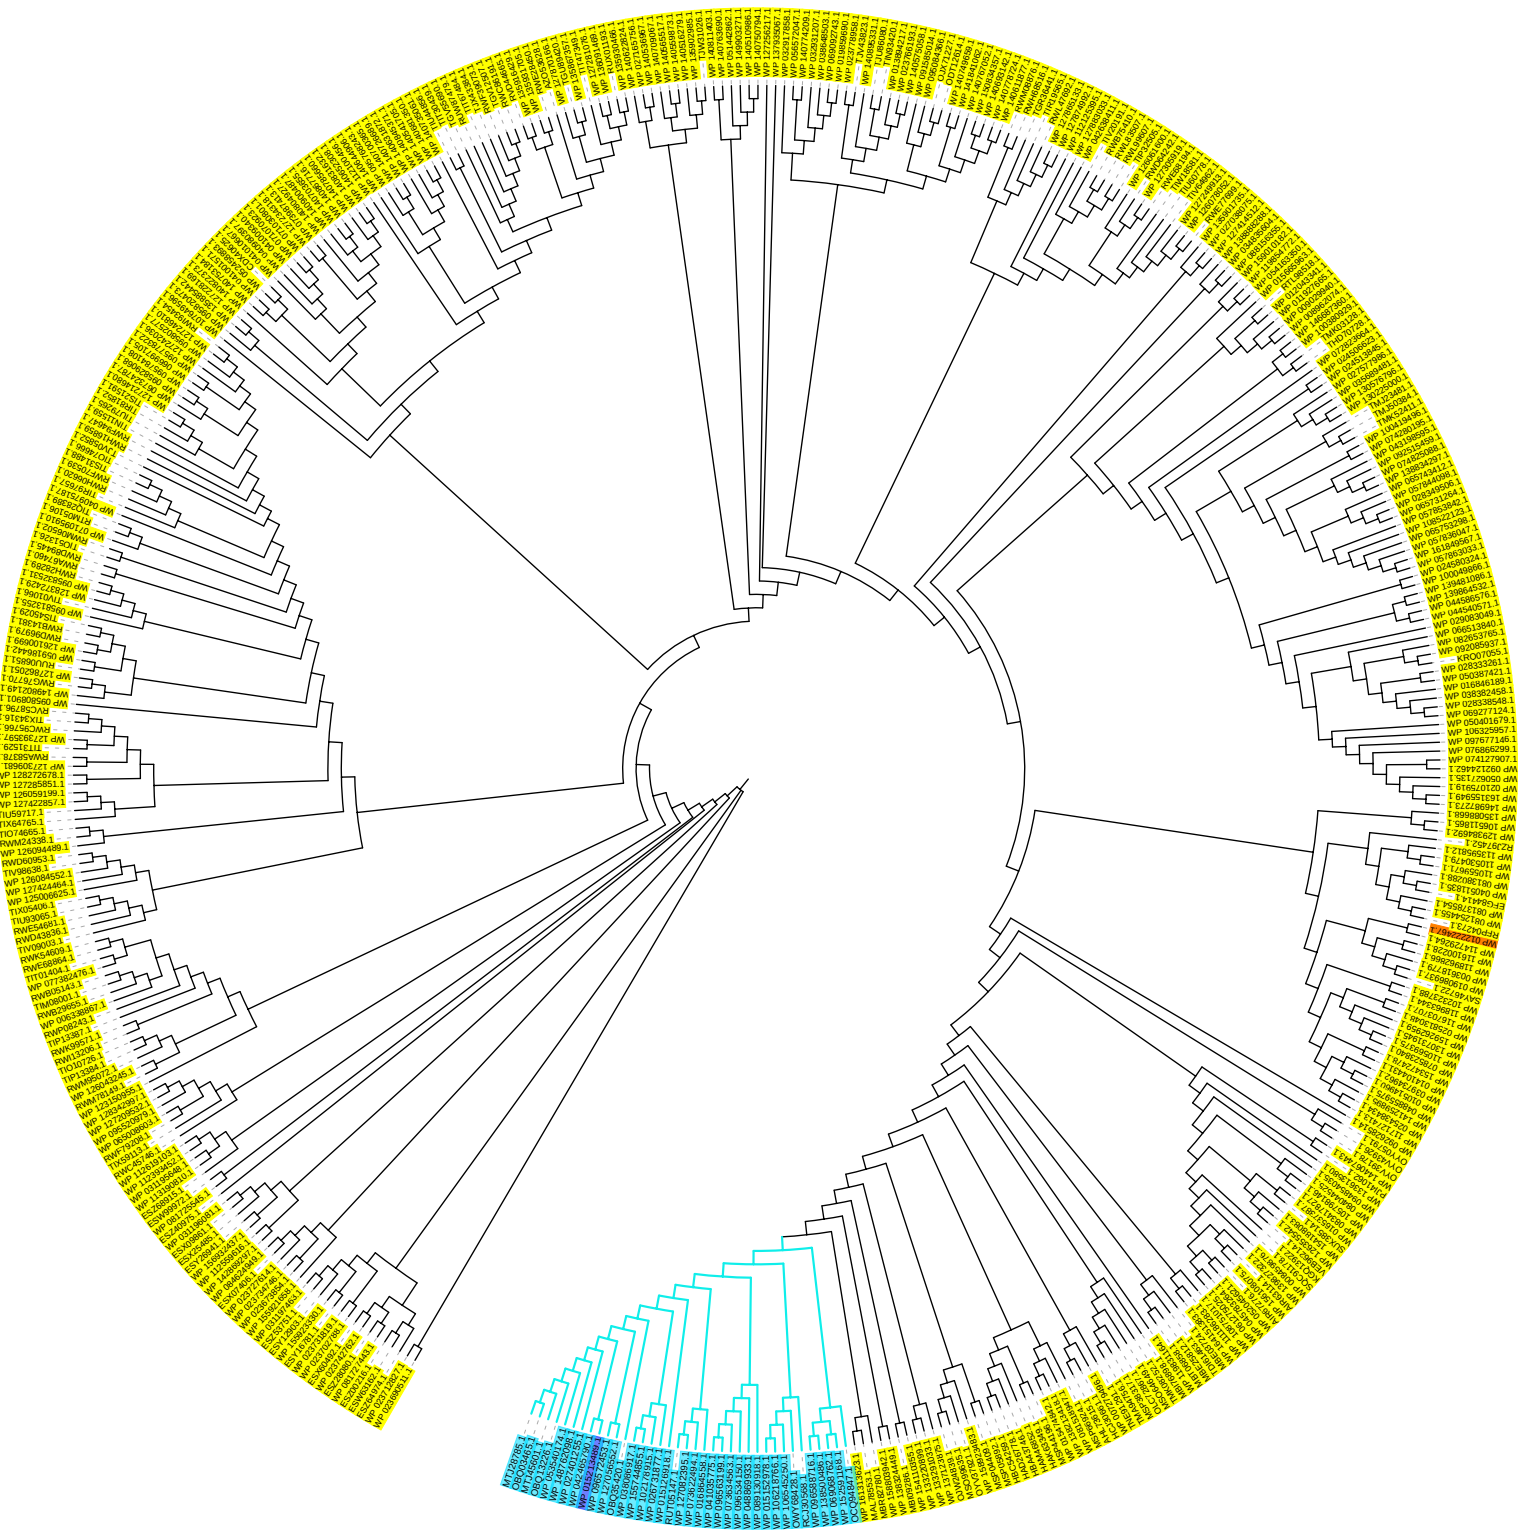

**Figure S1. Phylogenetic analysis of dioxygenase enzymes related to *Gluconacetobacter diazotrophicus* (orange).** These enzymes correspond to the phylum proteobacteria (yellow) and cyanobacteria (blue), including *Anabaena cylindrica* (navy blue).
