# Supplementary material for: First description of betalains biosynthesis in an aquatic organism: characterization of 4,5‐DOPA‐extradiol‐dioxygenase activity in the cyanobacteria Anabaena cylindrica
Source: PubMed Central journal article supplement — Microb Biotechnol. 2020 Aug 6;13(6):1948–59. doi: 10.1111/1751-7915.13641 (PMC7533325; doi:10.1111/1751-7915.13641), 2020-08-06
Supplement: MBT2-13-1948-s002.pdf [file MBT2-13-1948-s002.pdf]

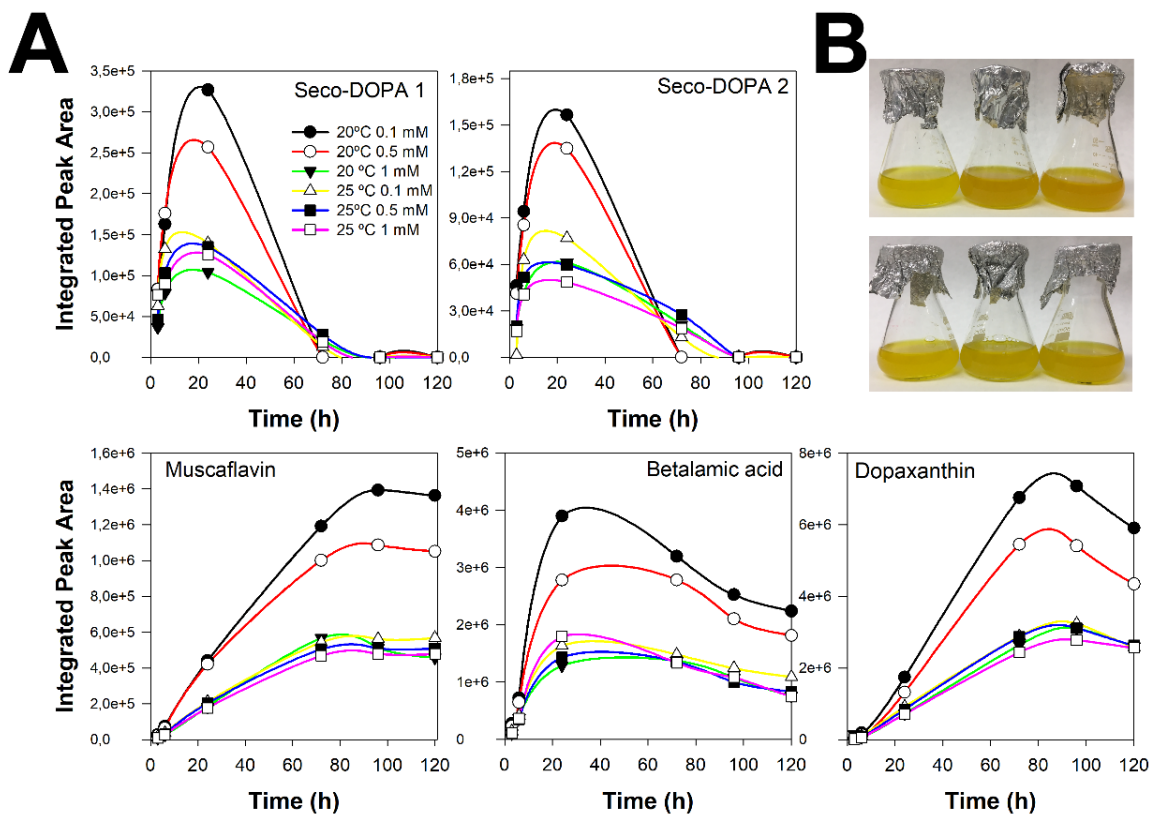

**Figure S2. Determination of the optimal conditions for the heterologous expression of AcDODA in *E. coli* cells.** **A:** Comparison of the obtention of the products from the activity of AcDODA and derived compounds in *E. coli* cultures supplemented with different concentrations of IPTG and maintained under different temperatures. The reactions were followed by HPLC in order to evaluate the presence of the enzyme. **B:** Macroscopic images of *E. coli* (pRSETA-AcDODA) cultures, after 24 hours of reaction, supplemented with 1.0 (left), 0.5 (centre) or 0.1 (right) mM IPTG and maintained at 20 °C (top) or 25 °C (bottom).
