# Supplementary figures and images for: First description of betalains biosynthesis in an aquatic organism: characterization of 4,5‐DOPA‐extradiol‐dioxygenase activity in the cyanobacteria Anabaena cylindrica
Source: PubMed Central journal article supplement — Microb Biotechnol. 2020 Aug 6;13(6):1948–59. doi: 10.1111/1751-7915.13641 (PMC7533325; doi:10.1111/1751-7915.13641), 2020-08-06

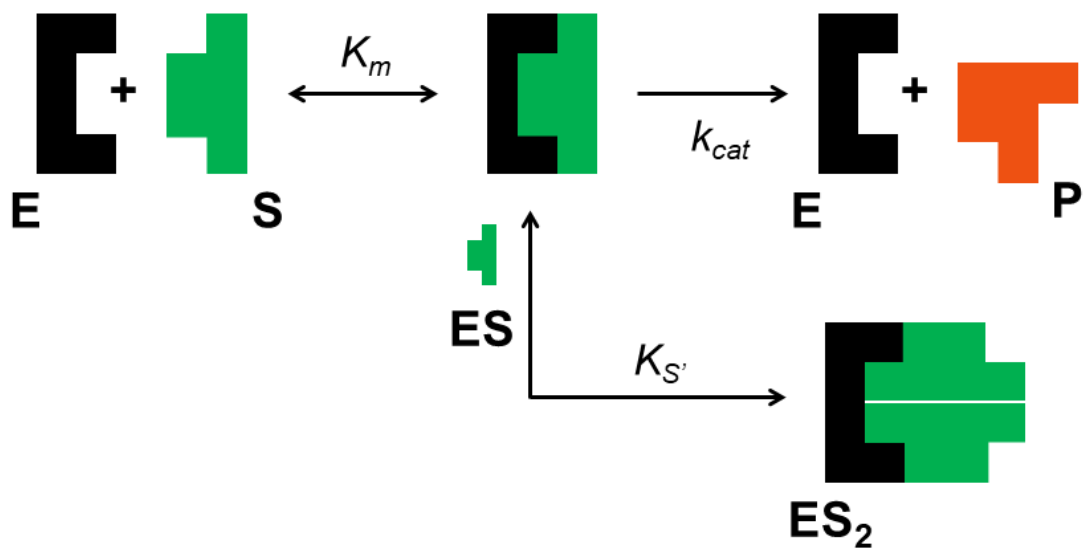

**Figure S3. Schematic representation and rate equation for inhibition by excess of substrate.**

Supplement: MBT2-13-1948-s003.pdf [file MBT2-13-1948-s003.pdf]
